# Supplementary material for: Pharmaceutical cocrystals of the anti-tuberculosis drug pyrazinamide with dicarboxylic and tricarboxylic acids
Source: Royal Society of Chemistry journal article supplement (doi:10.1039/c4ce02044h), 2014-11-19
Supplement: c4ce02044h1.pdf [file c4ce02044h1.pdf]

*Supplementary Information for*

**Pharmaceutical cocrystals of the anti-tuberculosis drug pyrazinamide with dicarboxylic and tricarboxylic acids†**

Jian-Rong Wang,<sup>a</sup> Chanjuan Ye,<sup>ab</sup> Bingqing Zhu,<sup>a</sup> Chun Zhou<sup>a</sup> and Xuefeng Mei<sup>a\*</sup>

<sup>a</sup> *Pharmaceutical Analytical & Solid-State Chemistry Research Center, Shanghai Institute of Materia Medica, Chinese Academy of Sciences, Shanghai 201203, China*

<sup>b</sup> *Department of Pharmacy, Nanchang University, Nanchang 330006, China*

**Table S1** Results of the screening experiments for the formation of cocrystals with PZA using dicarboxylic and tricarboxylic acids in MeOH, ethyl acetate (EA), and tetrahydrofuran (THF).

| Cocrystal former                                                                                                   | MeOH | EA | THF | Cocrystal former                                                                                                    | MeOH | EA | THF |
|--------------------------------------------------------------------------------------------------------------------|------|----|-----|---------------------------------------------------------------------------------------------------------------------|------|----|-----|
| 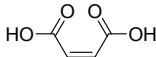<br>maleic acid                   | X    | X  | X   | <br>pimelic acid                  | X    | X  | X   |
| <br>L-malic acid                  | X    | X  | X   | <br>suberic acid                  | X    | X  | X   |
| <br>L-tartaric acid               | X    | X  | X   | <br>azelaic acid                  | X    | X  | X   |
| <br>glutaric acid                 | X    | X  | X   | <br>sebacic acid                  | ✓    | ✓  | ✓   |
| <br>$\alpha$ -ketoglutaric acid | X    | X  | X   | <br>citric acid                  | ✓    | ✓  | ✓   |
| <br>adipic acid                 | ✓    | ✓  | ✓   | <br><i>trans</i> -aconitic acid | ✓    | ✓  | ✓   |
| <br>mucic acid                  | X    | X  | X   | <br><i>cis</i> -aconitic acid   | X    | X  | X   |

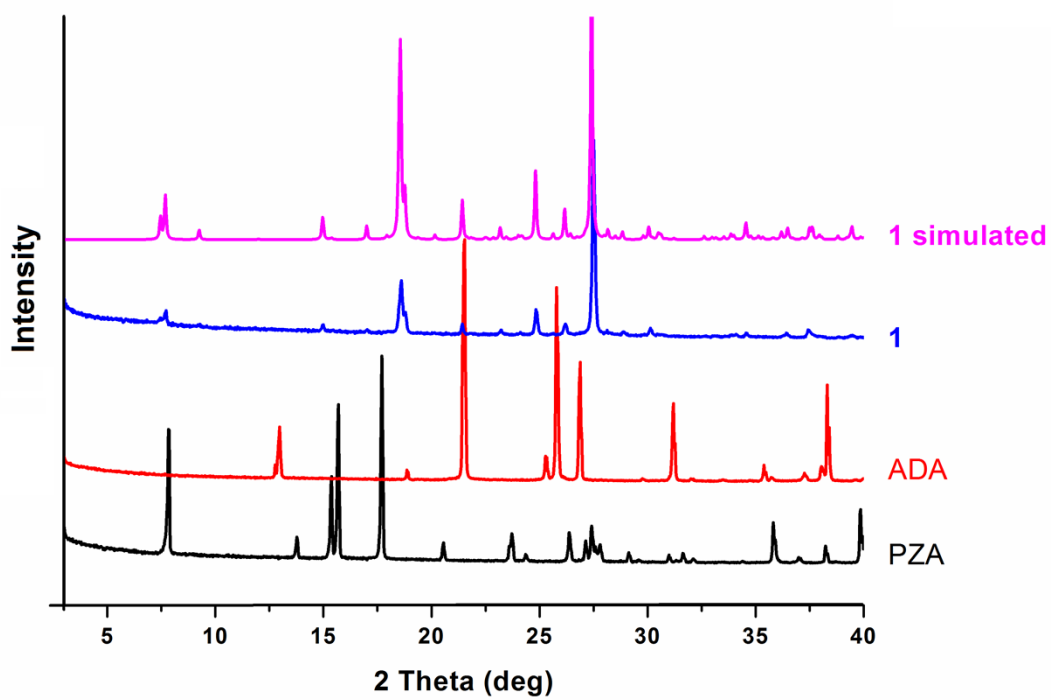

Fig. S1 PXR D patterns of cocystal 1

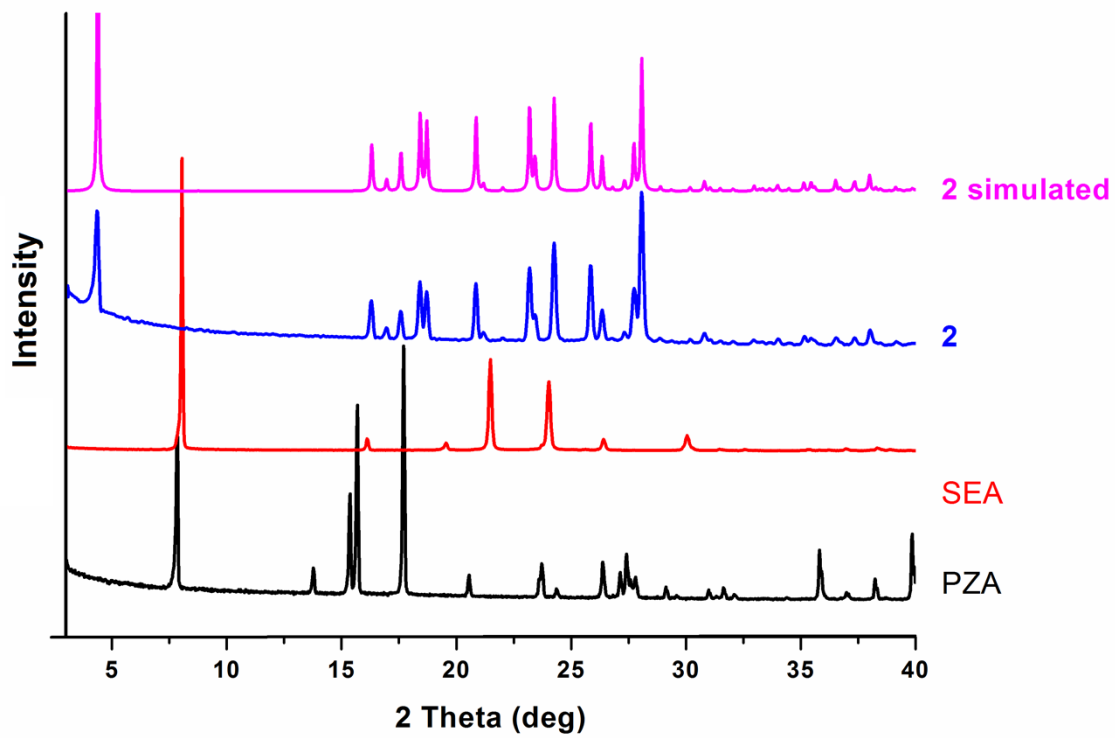

Fig. S2 PXR D patterns of cocystal 2

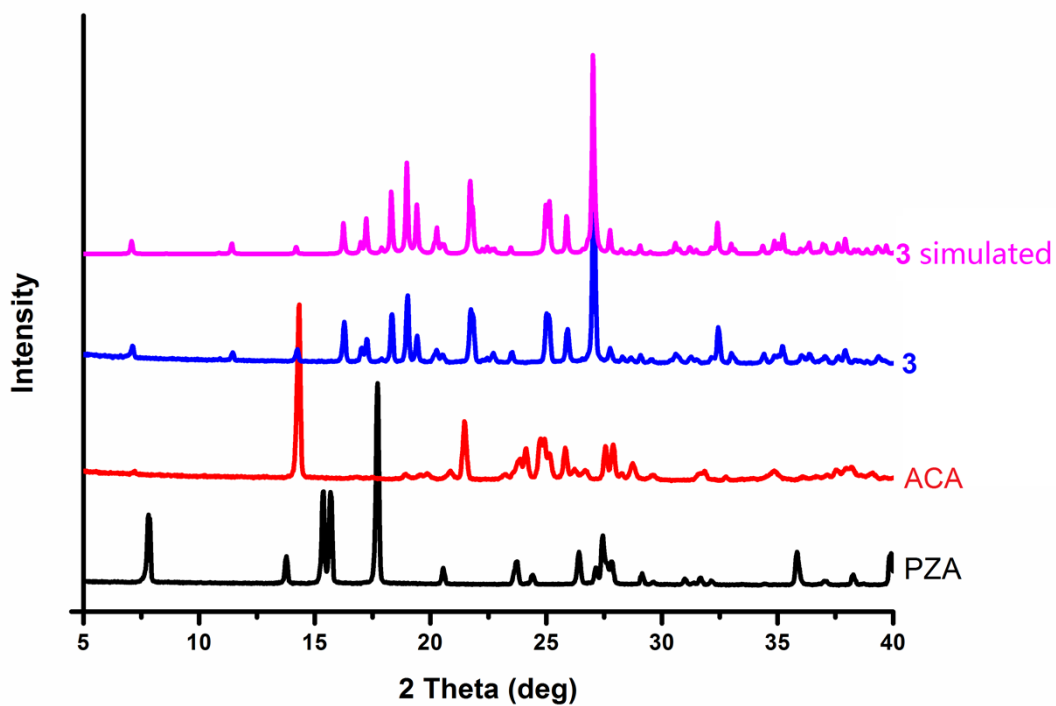

Fig. S3 PXRd patterns of cocystal 3

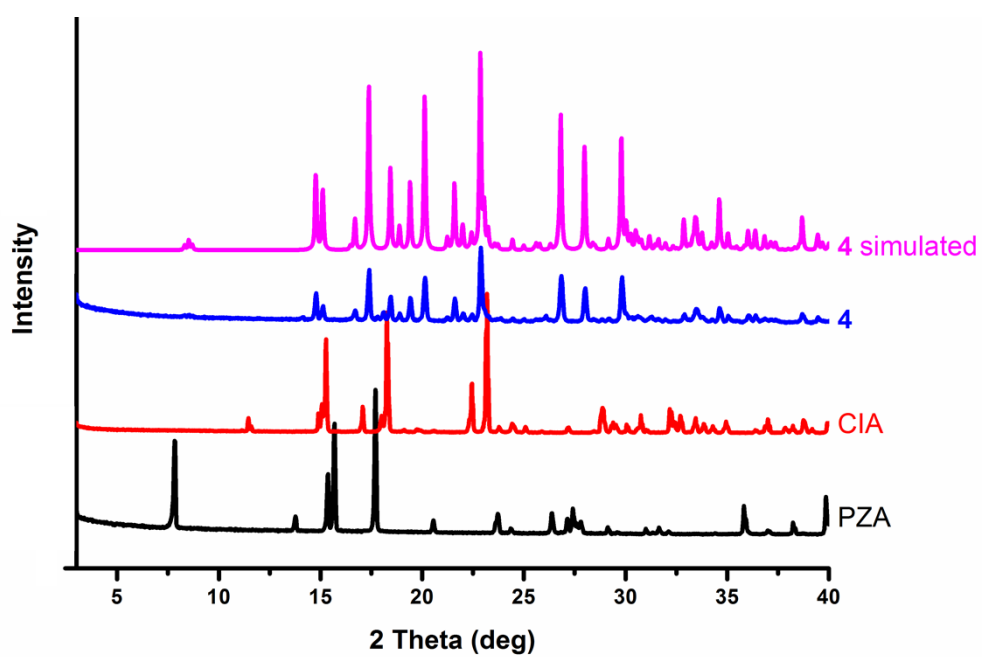

Fig. S4 PXRd patterns of cocystal 4

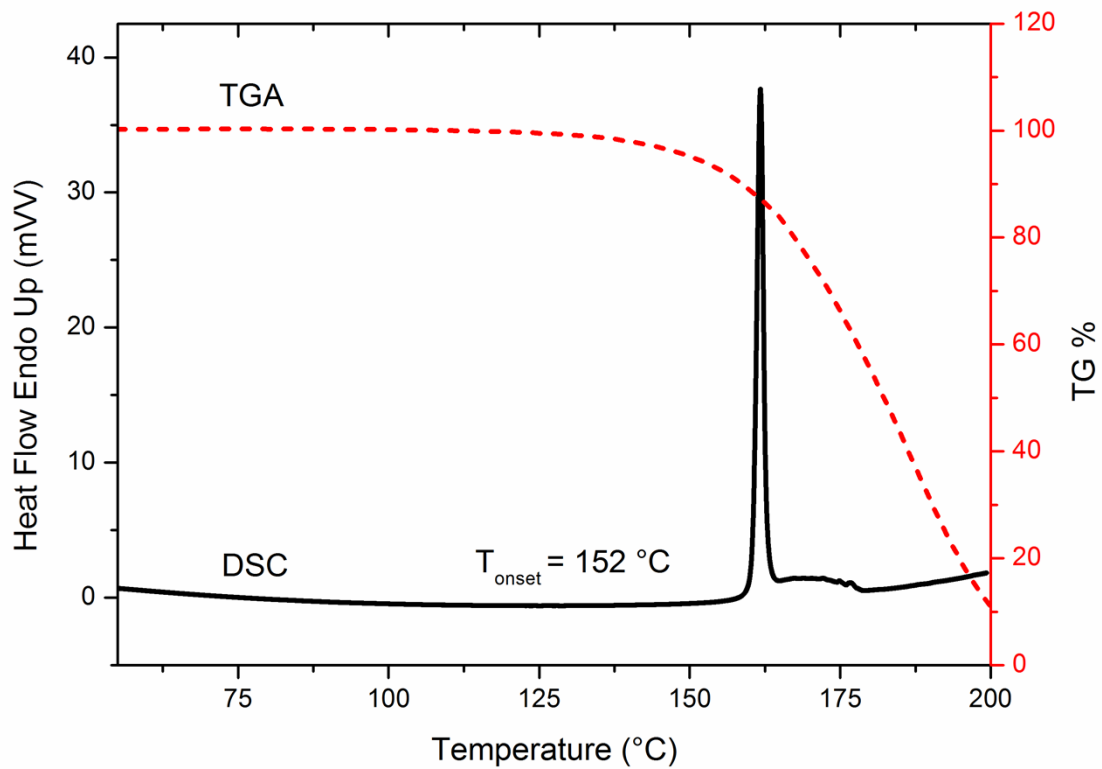

**Fig. S5** TGA compared with DSC of cocystal 1

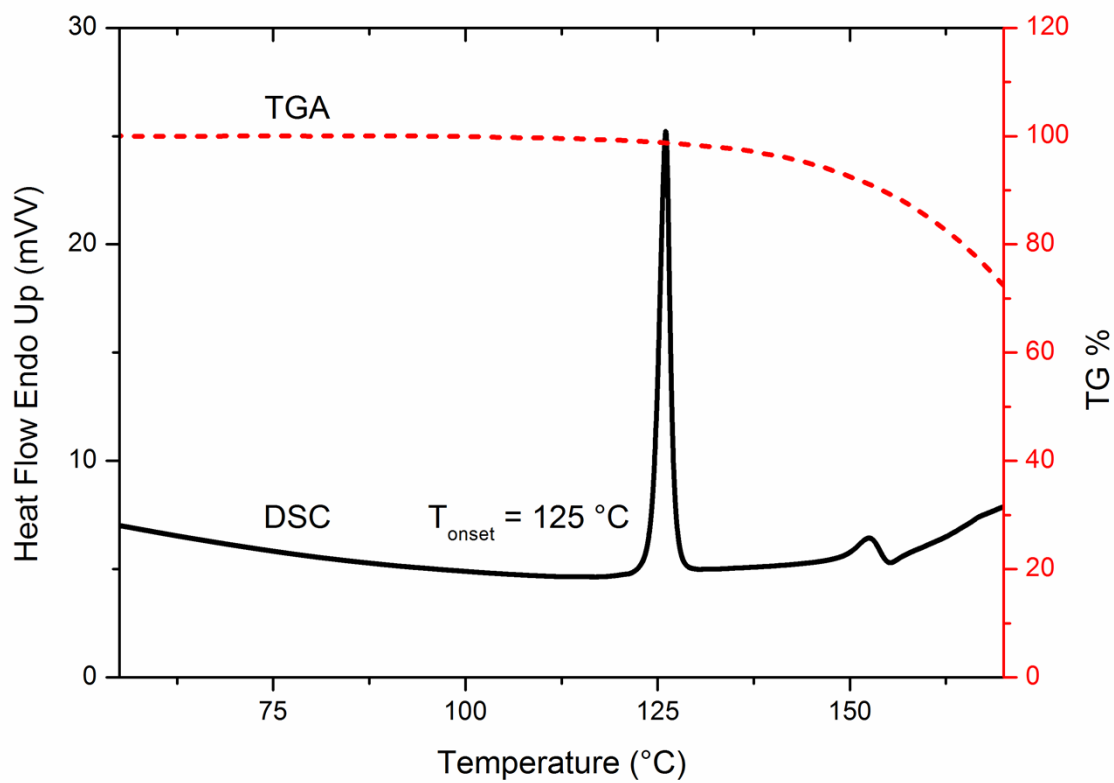

**Fig. S6** TGA compared with DSC of cocystal 2

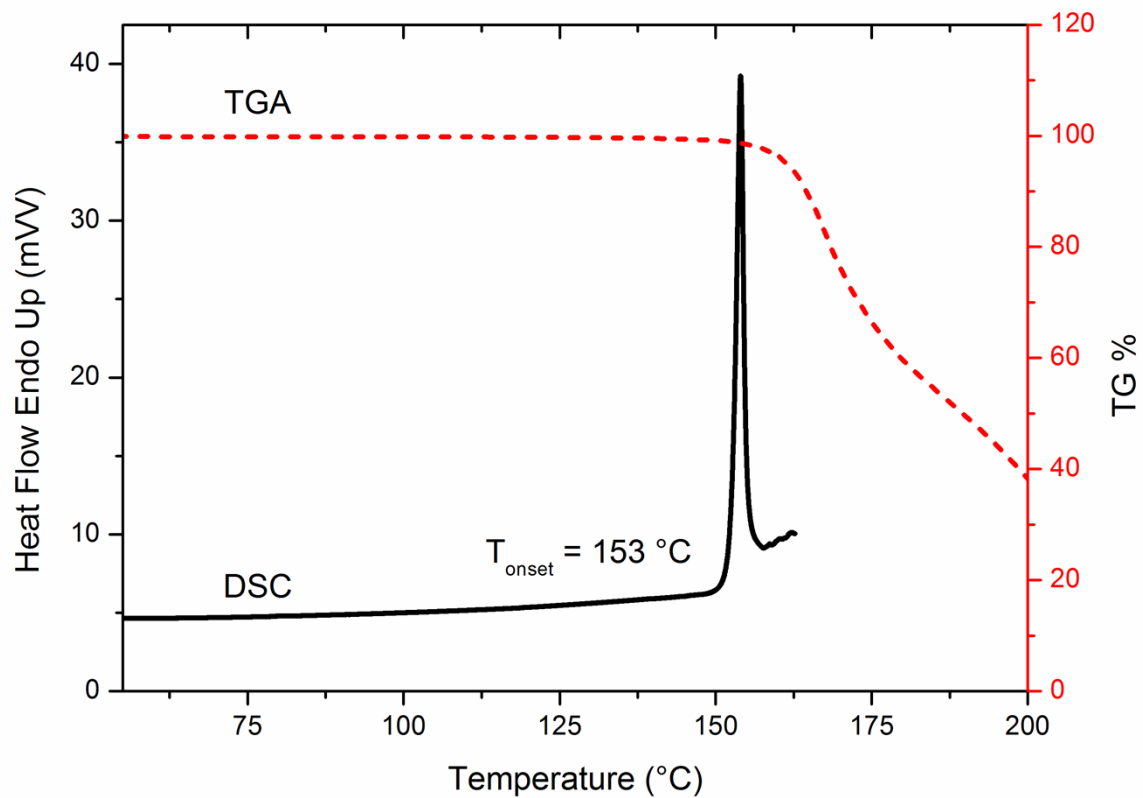

**Fig. S7** TGA compared with DSC of cocrystal **3**

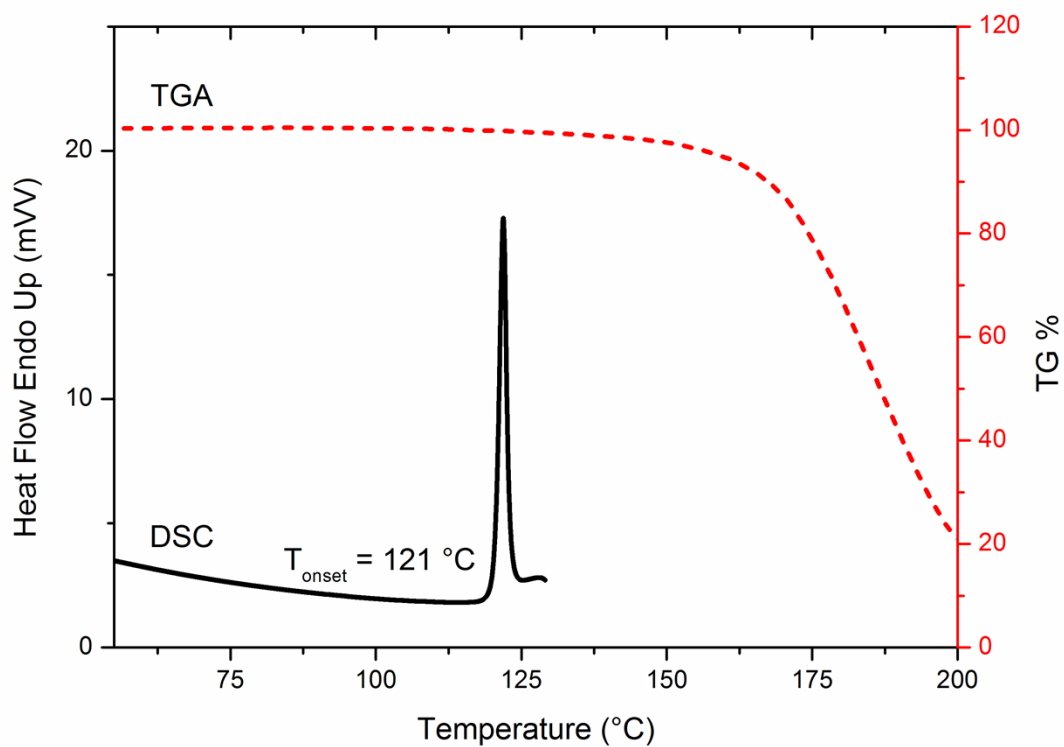

**Fig. S8** TGA compared with DSC of cocrystal **4**

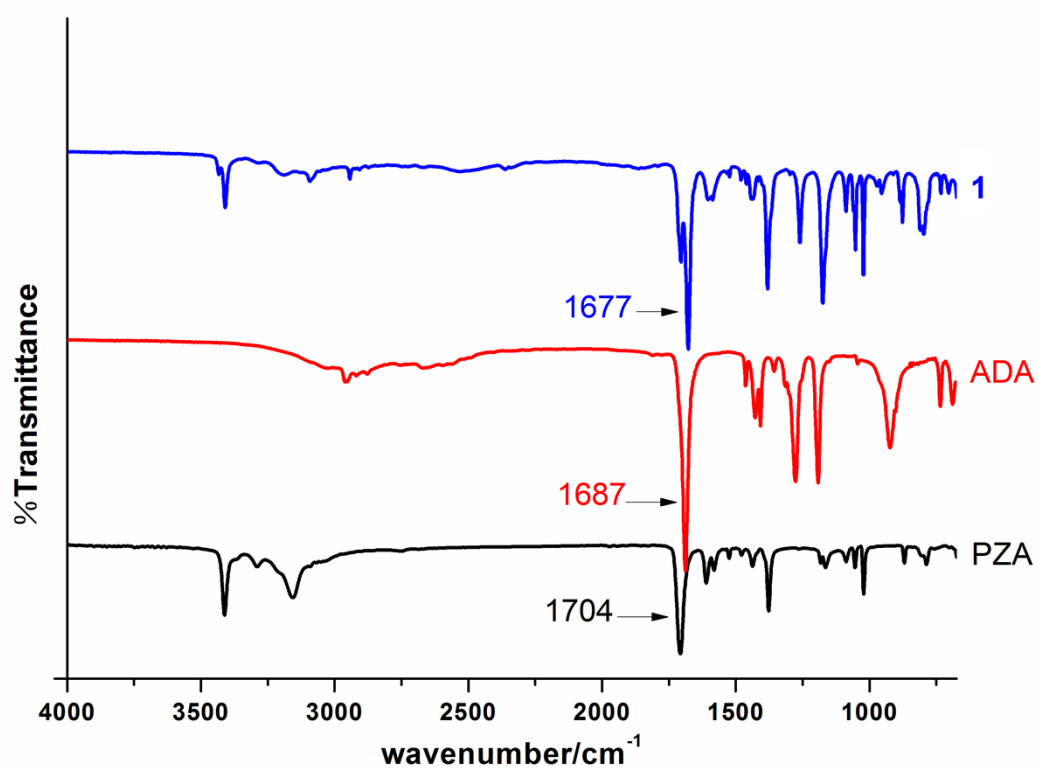

Fig. S9 IR spectra of PZA, ADA and cocystal 1

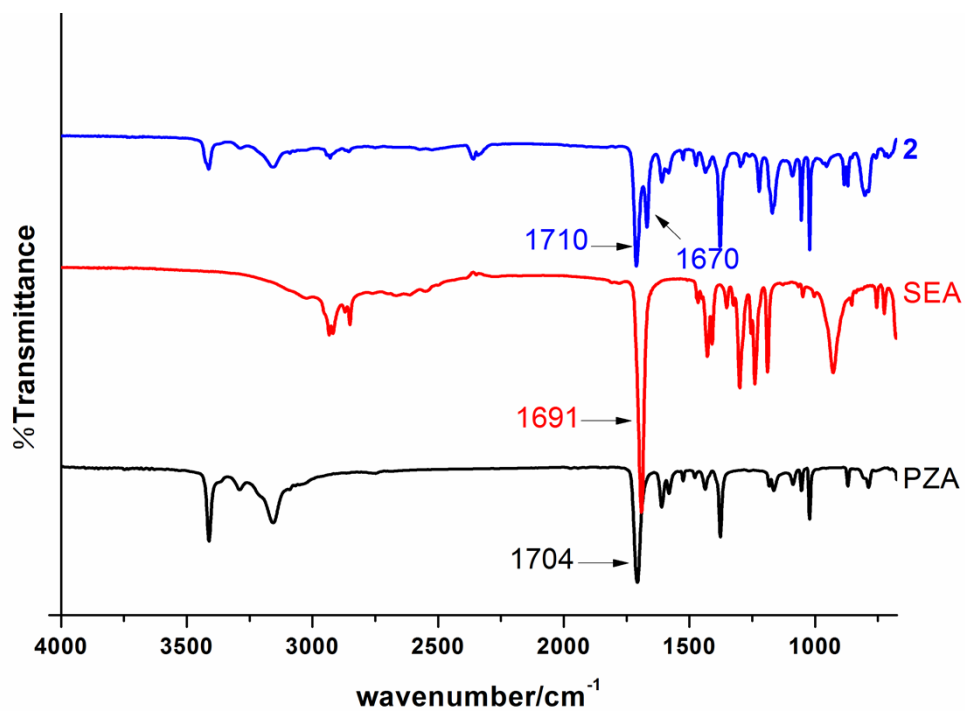

Fig. S10 IR spectra of PZA, SEA and cocystal 2

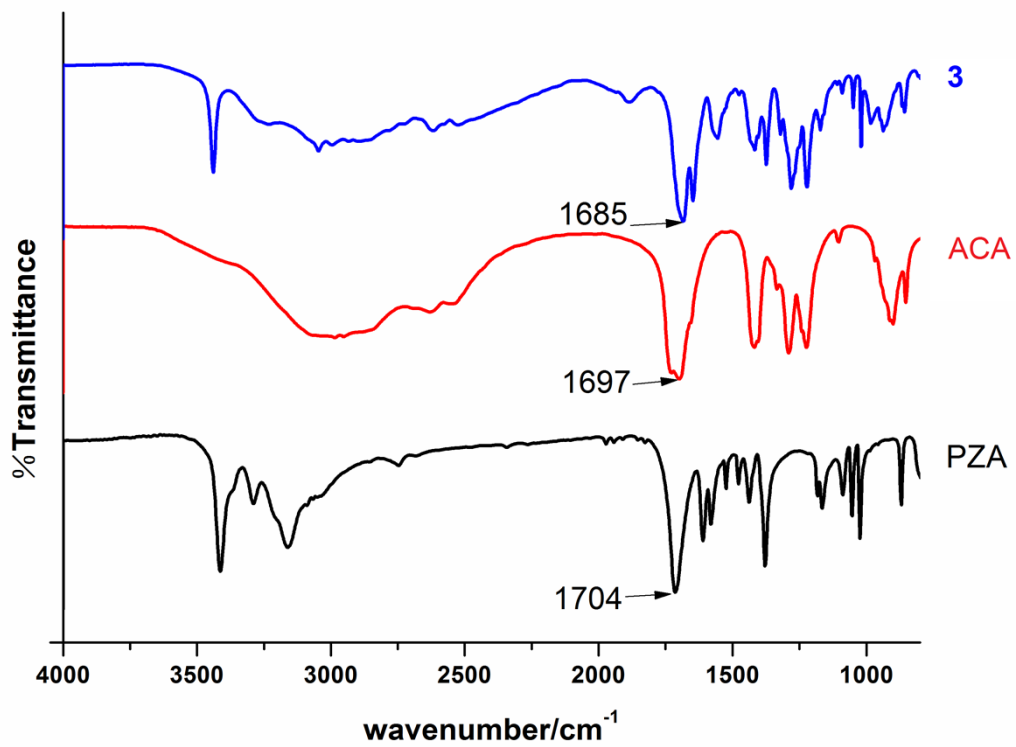

Fig. S11 IR spectra of PZA, ACA and cocrystal 3

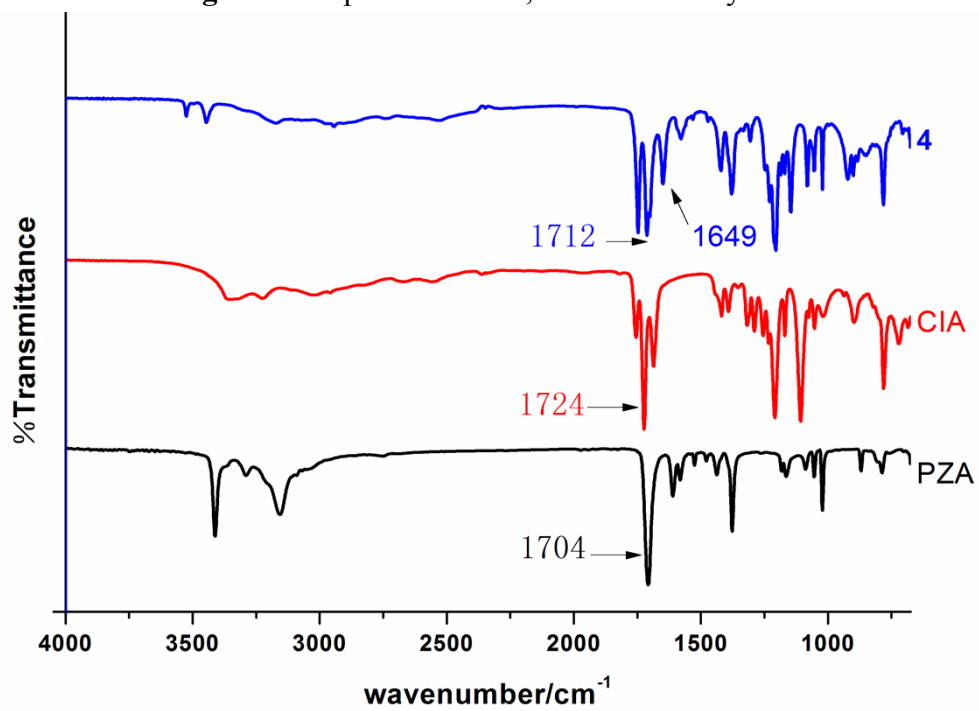

Fig. S12 IR spectra of PZA, CIA and cocrystal 4



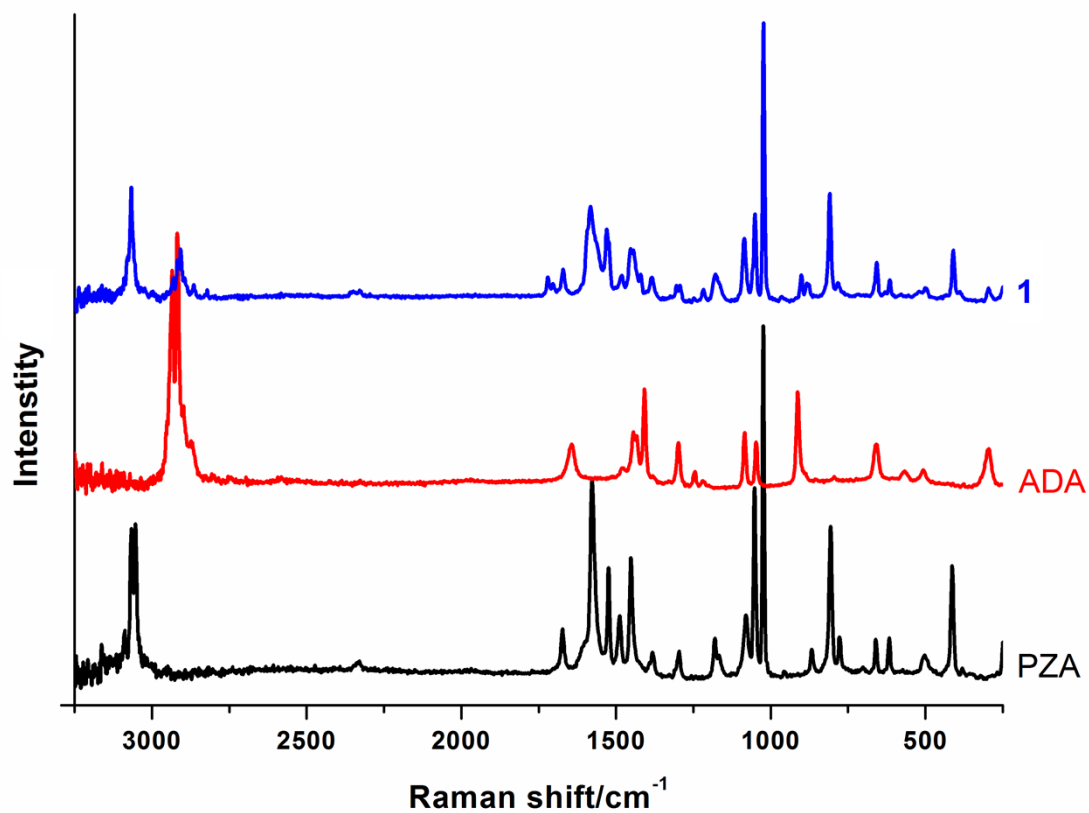

Fig. S13 Raman spectra of PZA, ADA and cocystal 1

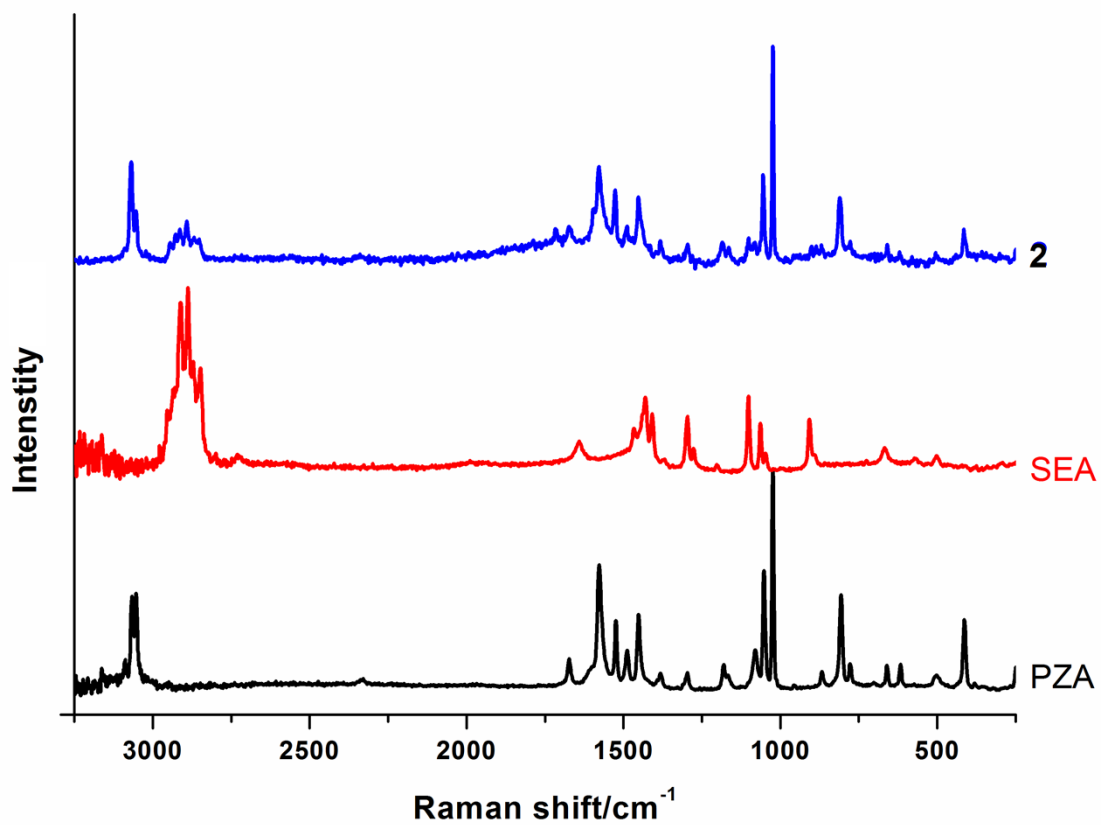

Fig. S14 Raman spectra of PZA, SEA and cocystal 2

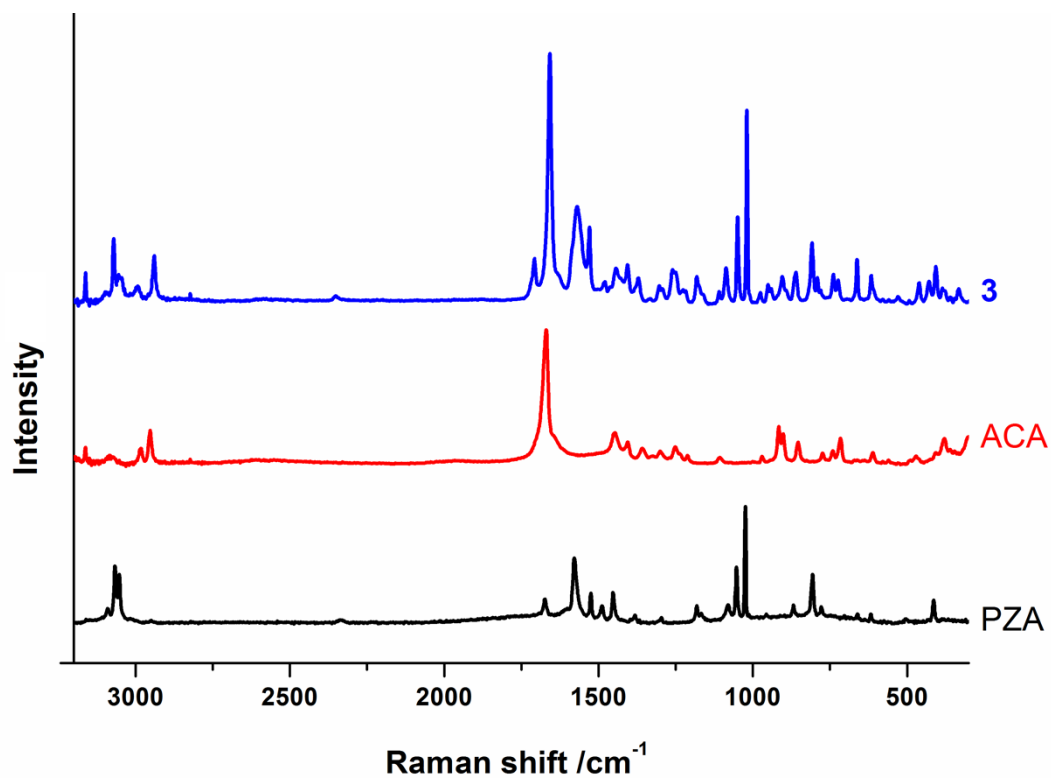

Fig. S15 Raman spectra of PZA, ACA and cocystal 3

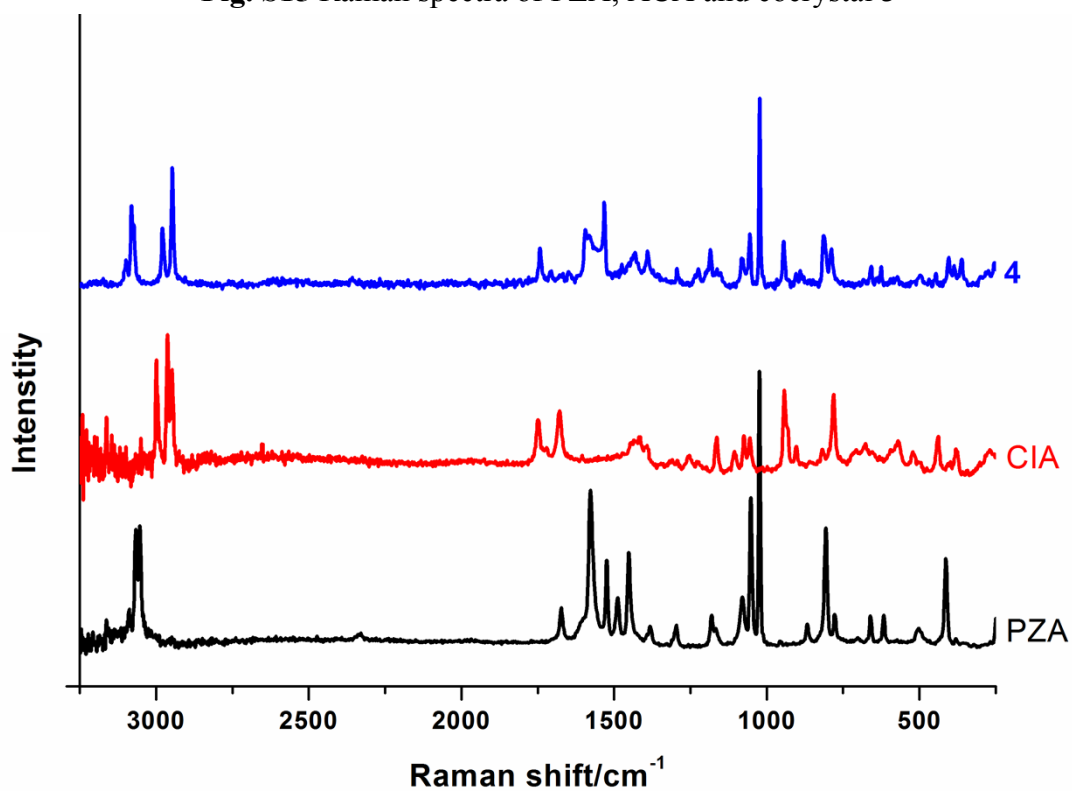

Fig. S16 Raman spectra of PZA, CIA and cocystal 4
